# Supplementary material
Source: HighWire-hosted journal article supplement (https://bmjopengastro.bmj.com/highwire/filestream/3607/field_highwire_adjunct_files/0/bmjgast-2022-001067supp001_data_supplement.pdf)
Supplement: bmjgast-2022-001067supp001_data_supplement.pdf [file bmjgast-2022-001067supp001_data_supplement.pdf]

**SUPPLEMENT 1****Search strategy**

**Cochrane central register, MEDLINE, EMBASE via Ovid SP, Science Citation Index-Expanded via Web of Science Core Collection of controlled trials were searched. No restrictions were applied with regard to language of publication.**

**For: Randomised Controlled Trial Searches****CENTRAL via Cochrane Library**

Date Run: 11/04/2022 18:26:28

#1 [mh "Inflammatory Bowel Diseases"] or [mh "Colitis, Ulcerative"] or [mh "Crohn Disease"] or ("Inflammatory Bowel Disease" or "Inflammatory Bowel Diseases" or Crohn\* or Colitis or Enteritis or Proctocolitis" or Ileocolitis or Enterocolitis or Ileitides or Ileitis or Colorectitis"):ti,ab with Cochrane Library publication date from Jan 2018 to present, in Trials 6923

#2 (clinicaltrials\* or trialsearch\*):so 397441

#3 #1 NOT #2 3743

**MEDLINE via Ovid SP**

Database: Ovid MEDLINE(R) ALL <1946 to April 08, 2022>

1 exp Inflammatory Bowel Diseases/ or Colitis, Ulcerative/ or Crohn Disease/ or ("Inflammatory Bowel Disease" or "Inflammatory Bowel Diseases" or Crohn\* or Colitis or Enteritis or Proctocolitis or Ileocolitis or Enterocolitis or Ileitides or Ileitis or Colorectitis).ti,ab. (167093)

2 ((Randomized Controlled Trial or Controlled Clinical Trial).pt. or (Randomi?ed or Placebo or Randomly or Trial or Groups).ab. or Drug Therapy.fs.) not (exp Animals/ not Humans.sh.) (4641476)

3 1 and 2 (43216)

4 limit 3 to ed=20180101-20221231 (10906)

5 limit 3 to dt=20180101-20221231 (10714)

6 4 or 5 (12373)

**Embase via Ovid SP**

Database: Embase <1974 to 2022 April 08>

- 1 Randomized controlled trial/ or Controlled clinical study/ or randomization/ or intermethod comparison/ or double blind procedure/ or human experiment/ or (random\$ or placebo or (open adj label) or ((double or single or doubly or singly) adj (blind or blinded or blindly)) or parallel group\$1 or crossover or cross over or ((assign\$ or match or matched or allocation) adj5 (alternate or group\$1 or intervention\$1 or patient\$1 or subject\$1 or participant\$1)) or assigned or allocated or (controlled adj7 (study or design or trial)) or volunteer or volunteers).ti,ab. or (compare or compared or comparison or trial).ti. or ((evaluated or evaluate or evaluating or assessed or assess) and (compare or compared or comparing or comparison)).ab. (5728242)
- 2 (random\$ adj sampl\$ adj7 ("cross section\$" or questionnaire\$1 or survey\$ or database\$1)).ti,ab. not (comparative study/ or controlled study/ or randomi?ed controlled.ti,ab. or randomly assigned.ti,ab.) (8944)
- 3 Cross-sectional study/ not (randomized controlled trial/ or controlled clinical study/ or controlled study/ or (randomi?ed controlled or control group\$1).ti,ab.) (305385)
- 4 (((case adj control\$) and random\$) not randomi?ed controlled).ti,ab. (19659)
- 5 (Systematic review not (trial or study)).ti. (206139)
- 6 (nonrandom\$ not random\$).ti,ab. (17705)
- 7 ("Random field\$" or (random cluster adj3 sampl\$)).ti,ab. (4107)
- 8 (review.ab. and review.pt.) not trial.ti. (982757)
- 9 "we searched".ab. and (review.ti. or review.pt.) (41335)
- 10 ("update review" or (databases adj4 searched)).ab. (49993)
- 11 (rat or rats or mouse or mice or swine or porcine or murine or sheep or lambs or pigs or piglets or rabbit or rabbits or cat or cats or dog or dogs or cattle or bovine or monkey or monkeys or trout or marmoset\$1).ti. and animal experiment/ (1145284)
- 12 Animal experiment/ not (human experiment/ or human/) (2404090)
- 13 or/2-12 (3934547)
- 14 1 not 13 (5075178)
- 15 Inflammatory Bowel Disease/ or exp Crohn Disease/ or Ulcerative Colitis/ or Acute Severe Ulcerative Colitis/ or ("Inflammatory Bowel Disease" or "Inflammatory Bowel Diseases" or Crohn\* or

Colitis or Enteritis or Proctocolitis or Ileocolitis or Enterocolitis or Ileitides or Ileitis or Colorectitis).ti,ab.  
(263786)

16 14 and 15 (45879)

17 limit 16 to dc=20180101-20221231 (15753)

18 limit 16 to dd=20180101-20221231 (8910)

19 17 or 18 (15770)

20 limit 19 to embase (5793)

### Science Citation Index-Expanded via Web of Science Core Collection

#3 #1 AND #2 Editions: Science Citation Index Expanded (SCI-EXPANDED)--10:49 PM | Timespan:  
2018-01-01 to 2022-12-31 (Publication Date) 4,447

#2 "Inflammatory Bowel Disease" or "Inflammatory Bowel Diseases" or Crohn\* or Colitis or  
Enteritis or Proctocolitis or Ileocolitis or Enterocolitis or Ileitides or Ileitis or Colorectitis (Title) or  
"Inflammatory Bowel Disease" or "Inflammatory Bowel Diseases" or Crohn\* or Colitis or Enteritis or  
Proctocolitis or Ileocolitis or Enterocolitis or Ileitides or Ileitis or Colorectitis (Abstract) 177,968

#1 Random\* OR Blind\* OR Allocat\* OR Assign\* OR Trial\* OR Placebo\* OR Crossover\* OR Cross-  
Over\* (Title) or Random\* OR Blind\* OR Allocat\* OR Assign\* OR Trial\* OR Placebo\* OR Crossover\* OR  
Cross-Over\* (Abstract) 2,995,649

**Cochrane Database of Systematic Reviews via Cochrane Library, MEDLINE, EMBASE via Ovid SP, Epistemonikos of Systematic Review Searches were searched:** No restrictions were applied with regard to language of publication

### Cochrane Database of Systematic Reviews via Cochrane Library

Date Run: 11/04/2022 18:58:06

#1 [mh "Inflammatory Bowel Diseases"] or [mh "Colitis, Ulcerative"] or [mh "Crohn Disease"] or ("Inflammatory Bowel Disease" or "Inflammatory Bowel Diseases" or Crohn\* or Colitis or Enteritis or Proctocolitis" or Ileocolitis or Enterocolitis or Ileitides or Ileitis or Colorectitis):ti,ab with Cochrane Library publication date from Jan 2018 to present, in Cochrane Reviews, Cochrane Protocols 67

### MEDLINE via Ovid SP

Database: Ovid MEDLINE(R) ALL <1946 to April 08, 2022>

1 (systematic review or meta-analysis).pt. or meta-analysis/ or systematic review/ or systematic reviews as topic/ or meta-analysis as topic/ or "meta analysis (topic)" or "systematic review (topic)" or exp technology assessment, biomedical/ or network meta-analysis/ or ((systematic\* adj3 (review\* or overview\*)) or (methodologic\* adj3 (review\* or overview\*))).ti,ab,kf,kw. or ((quantitative adj3 (review\* or overview\* or synthes\*)) or (research adj3 (integrati\* or overview\*))).ti,ab,kf,kw. or ((integrative adj3 (review\* or overview\*)) or (collaborative adj3 (review\* or overview\*)) or (pool\* adj3 analy\*)).ti,ab,kf,kw. or (data synthes\* or data extraction\* or data abstraction\*).ti,ab,kf,kw. or (handsearch\* or hand search\*).ti,ab,kf,kw. or (mantel haenszel or peto or der simonian or dersimonian or fixed effect\* or latin square\*).ti,ab,kf,kw. or (met analy\* or metanaly\* or technology assessment\* or HTA or HTAs or technology overview\* or technology appraisal\*).ti,ab,kf,kw. or (meta regression\* or metaregression\*).ti,ab,kf,kw. or (meta-analy\* or metaanaly\* or systematic review\* or biomedical technology assessment\* or bio-medical technology assessment\*).mp,hw. or (medline or cochrane or pubmed or medlars or embase or cinahl).ti,ab, hw. or (cochrane or (health adj2 technology assessment) or evidence report).jw. or (comparative adj3 (efficacy or effectiveness)).ti,ab,kf,kw. or (outcomes research or relative effectiveness).ti,ab,kf,kw. or ((indirect or indirect treatment or mixed-treatment or bayesian) adj3 comparison\*).ti,ab,kf,kw. or (multi\* adj3 treatment adj3 comparison\*).ti,ab,kf,kw. or (mixed adj3 treatment adj3 (meta-analy\* or metaanaly\*)).ti,ab,kf,kw. or umbrella review\*.ti,ab,kf,kw. or (multi\* adj2 paramet\* adj2 evidence adj2 synthesis).ti,ab,kw,kf. or (multiparamet\* adj2 evidence adj2 synthesis).ti,ab,kw,kf. or (multi-paramet\* adj2 evidence adj2 synthesis).ti,ab,kw,kf. (592972)

2 Comment/ or Letter/ or Editorial/ or (Animal/ not (Animal/ and Human/)) (6932594)

3 1 not 2 (558272)

4 exp Inflammatory Bowel Diseases/ or Colitis, Ulcerative/ or Crohn Disease/ or ("Inflammatory Bowel Disease" or "Inflammatory Bowel Diseases" or Crohn\* or Colitis or Enteritis or Proctocolitis or Ileocolitis or Enterocolitis or Ileitides or Ileitis or Colorectitis).ti,ab. (167093)

- 5 3 and 4 (5777)
- 6 limit 5 to ed=20180101-20221231 (2109)
- 7 limit 5 to dt=20180101-20221231 (2414)
- 8 6 or 7 (2707)

### Embase via Ovid SP

Database: Embase <1974 to 2022 April 08>

- 1 (systematic review or meta-analysis).pt. or meta-analysis/ or systematic review/ or systematic reviews as topic/ or meta-analysis as topic/ or "meta analysis (topic)"/ or "systematic review (topic)"/ or exp technology assessment, biomedical/ or network meta-analysis/ or ((systematic\* adj3 (review\* or overview\*)) or (methodologic\* adj3 (review\* or overview\*))).ti,ab,kf,kw. or ((quantitative adj3 (review\* or overview\* or syntheses\*)) or (research adj3 (integrati\* or overview\*))).ti,ab,kf,kw. or ((integrative adj3 (review\* or overview\*)) or (collaborative adj3 (review\* or overview\*)) or (pool\* adj3 analy\*)).ti,ab,kf,kw. or (data syntheses\* or data extraction\* or data abstraction\*).ti,ab,kf,kw. or (handsearch\* or hand search\*).ti,ab,kf,kw. or (mantel haenszel or peto or der simonian or dersimonian or fixed effect\* or latin square\*).ti,ab,kf,kw. or (met analy\* or metanaly\* or technology assessment\* or HTA or HTAs or technology overview\* or technology appraisal\*).ti,ab,kf,kw. or (meta regression\* or metaregression\*).ti,ab,kf,kw. or (meta-analy\* or metaanaly\* or systematic review\* or biomedical technology assessment\* or bio-medical technology assessment\*).mp,hw. or (medline or cochrane or pubmed or medlars or embase or cinahl).ti,ab,hw. or (cochrane or (health adj2 technology assessment) or evidence report).jw. or (comparative adj3 (efficacy or effectiveness)).ti,ab,kf,kw. or (outcomes research or relative effectiveness).ti,ab,kf,kw. or ((indirect or indirect treatment or mixed-treatment or bayesian) adj3 comparison\*).ti,ab,kf,kw. or (multi\* adj3 treatment adj3 comparison\*).ti,ab,kf,kw. or (mixed adj3 treatment adj3 (meta-analy\* or metaanaly\*)).ti,ab,kf,kw. or umbrella review\*.ti,ab,kf,kw. or (multi\* adj2 paramet\* adj2 evidence adj2 synthesis).ti,ab,kw,kf. or (multiparamet\* adj2 evidence adj2 synthesis).ti,ab,kw,kf. or (multi-paramet\* adj2 evidence adj2 synthesis).ti,ab,kw,kf. (857254)
- 2 (letter or editorial).pt. or (animal/ not (animal/ and human/)) (3072751)
- 3 1 not 2 (819114)
- 4 Inflammatory Bowel Disease/ or exp Crohn Disease/ or Ulcerative Colitis/ or Acute Severe Ulcerative Colitis/ or ("Inflammatory Bowel Disease" or "Inflammatory Bowel Diseases" or Crohn\* or Colitis or Enteritis or Proctocolitis or Ileocolitis or Enterocolitis or Ileitides or Ileitis or Coloproctitis).ti,ab. (263786)
- 5 3 and 4 (11728)
- 6 limit 5 to dc=20180101-20221231 (5157)
- 7 limit 5 to dd=20180101-20221231 (1827)
- 8 6 or 7 (5163)
- 9 limit 8 to embase (3237)

**Epistemonikos**

(title:("Inflammatory Bowel Disease" OR "Inflammatory Bowel Diseases" OR Crohn\* OR Colitis OR Enteritis OR Proctocolitis OR Ileocolitis OR Enterocolitis OR Ileitides OR Ileitis OR Colorectitis) OR abstract:("Inflammatory Bowel Disease" OR "Inflammatory Bowel Diseases" OR Crohn\* OR Colitis OR Enteritis OR Proctocolitis OR Ileocolitis OR Enterocolitis OR Ileitides OR Ileitis OR Colorectitis))

Publication year: 2018 – 2022

Publication type: Systematic Review (Cochrane Review: No) 1,761

Publication type: Broad Synthesis 58

Publication type: Structured Summary 0
